# Supplementary material for: Chromatin remodeling enzyme Snf2h regulates embryonic lens differentiation and denucleation
Source: Oxford University Press journal article supplement (doi:10.1242/dev.135285), 2016-05-31
Supplement: dev135285supp.pdf [file dev135285supp.pdf]

**Supplementary Table S1.** Classification of transcriptional changes of genes in major biological functions by gene ontology (GO) in the *Snf2h* mutants.

| Terms       | Catagories                                  | Genes(Red=Upregulated; Blue=Downregulated)                                                                                                                                                                                                                                                                                                                                                                                                                                                                                                                                                                                                                                                                                                                                                                                                                                                                                                                                                                                                                                                                                                                                 |
|-------------|---------------------------------------------|----------------------------------------------------------------------------------------------------------------------------------------------------------------------------------------------------------------------------------------------------------------------------------------------------------------------------------------------------------------------------------------------------------------------------------------------------------------------------------------------------------------------------------------------------------------------------------------------------------------------------------------------------------------------------------------------------------------------------------------------------------------------------------------------------------------------------------------------------------------------------------------------------------------------------------------------------------------------------------------------------------------------------------------------------------------------------------------------------------------------------------------------------------------------------|
| GO: 0006325 | ~chromatin organization                     | HIST2H2AA2, EZH1, HIST1H2AD, ARID4B, CTCF, HIST2H3C1, LOC100047441, CBX8, HIST2H2AA1, MLL5, HIST2H2AC, SMARCD1, PBRM1, MLL3, KDM5A, HIST3H2BA, BAZ2A, DNMT3B, KDM5B, MLL1, CHD4, DNMT3A, SATB1, HIST1H1C, MTA2, HMG20A, BANP, ARID1A, MBD3, SUV420H2, HDAC3, PRDM9, SMARCE1, BAZ1B, BPTF, JMJD6, MSL1, SMARCC1, ASH1L, PHF21A, SMARCA2, APBB1, NCOR1, RNF20, HIST1H2AN, SMARCA4                                                                                                                                                                                                                                                                                                                                                                                                                                                                                                                                                                                                                                                                                                                                                                                            |
| GO: 004549  | ~regulation of transcription                | THRA, LOC100044968, CNOT3, BBX, NR2E3, RORA, CBX8, CNOT4, PNN, IGHMBP2, MAGED1, MLL5, SIN3A, LOC100047138, MED27, PQBP1, MLL3, MLL1, SATB1, TCFAP2B, RCOR2, MTA2, TCFAP2A, HMG20A, TAF6L, PPARGC1A, DDIT3, SUV420H2, PRDM9, HIF1A, PIAS4, RFC1, BAZ1B, VEGFA, MGA, ZFP260, VGLL4, SMARCA2, SMARCA4, FUS, HMGB1, HMGB2, SOX4, NFKB1A, SOX9, NR2C2, LHX1, ELK4, PBRM1, TCF4, LHX9, DNMT3B, TCF25, HIP1, PLAGL2, KLF6, DNMT3A, TESC, TAF7, CELSR2, SNW1, ZFP148, SMAD1, ZFP445, ZFP444, USF1, SAFB2, NRF1, RNF6, HDAC3, MLX, SMARCC1, ATF7, SUPT16H, RFX2, NCOR1, NCOR2, KLF3, NKAP, LOC100046855, BACH1, ELF2, EZH1, CCNT1, ARID4B, CTCF, PHF20, ZKSCAN3, BZW1, LBH, POU5F1, ANP32A, LRRFIP1, KDM5A, KDM5B, SERTAD2, SSBP3, SSBP2, ARID5B, ZFX, RUNX1T1, GTF2H4, BANP, TLE1, SPEN, TOPORS, MBD3, PURB, PCGF1, JMY, PURA, NCOA1, BRWD1, BPTF, HMGIL1, BTG2, GTF2I, ASH1L, HIPK2, LOC637733, MDM4, RBM39, MED1, ZFP395, MTDH, UBE3A, NFIX, ZFP318, ZFP316, 5730403M16RIK, ZFP191, CENPB, RB1CC1, GATAD2B, ZFP219, BCL9L, NFATC2, ING1, ETV5, BAZ2A, CHD4, IL4, NLK, HMBOX1, ILF3, DACH1, ATRX, PKNOX1, GMCL1, ID2, UBTf, JMJD6, THRAP3, PHF21A, ZBTB3, ID3, TBL1X, NFIC, APBB1 |
| GO: 0032259 | ~methylation                                | SATB1, DNMT3A, ILF3, CTCF, SUV420H2, MLL5, PRMT1, PRDM9, BTG2, MLL3, BAZ2A, DNMT3B, MLL1                                                                                                                                                                                                                                                                                                                                                                                                                                                                                                                                                                                                                                                                                                                                                                                                                                                                                                                                                                                                                                                                                   |
| GO: 0007049 | ~cell cycle                                 | CCNT1, MLL5, SIN3A, EVI5, CEP250, CDKN2D, RANBP1, PARD3B, TUBB3, ASPM, ESCO1, ZC3HC1, CEP110, SKP2, BANP, DDIT3, JMY, LOC100045547, PRDM9, SPAG5, MDM2, PDCD6IP, MDM4, SEPT6, PPP2R3A, RABGAP1, NEK1, CAMK2G, CEP164, CEP55, ZFP318, SPC25, GADD45GIP1, RB1CC1, CLASPI, ING1, APC, EXO1, PDS5A, CENPE, CDC20, 9130404D08RIK, ATM,                                                                                                                                                                                                                                                                                                                                                                                                                                                                                                                                                                                                                                                                                                                                                                                                                                          |
| GO: 0000280 | ~nuclear division                           | ZC3HC1, PDS5A, NEK1, CENPE, CDC20, CEP164, CEP55, 9130404D08RIK, SPC25, RPS6KA2, SPAG5, CLASPI, SMC1A, CIT, TUBB3, ASPM, APC                                                                                                                                                                                                                                                                                                                                                                                                                                                                                                                                                                                                                                                                                                                                                                                                                                                                                                                                                                                                                                               |
| GO: 0042127 | ~regulation of cell proliferation           | WNT5A, APOBEC1, FGFR3, IL18, BTC, PAX3, PMAIP1, SKAP2, SOX9, MSX2, ARX, PRL2C3, PRL2C4, HOXA3, GATA3, TDGF1, TRP63, LHX5, HSF4, CALCL, TFF1, FIGF, FANCA, PRL2C2, TES, CLEC2I, NOX4, KLF5, AR, ICOSL, NANOG, CD3E, IGH-6, DBH, LEFTY1, SHOX2, SMO, MSX1, EREG, SERPINB5, CCND2, NOTCH4, NR5A2, KLF4, AY074887                                                                                                                                                                                                                                                                                                                                                                                                                                                                                                                                                                                                                                                                                                                                                                                                                                                              |
| GO: 0002009 | ~morphogenesis of an epithelium             | WNT5A, KRT6A, AR, FGFR3, BTRC, CELSR1, PAX3, SOX9, ALDH1A1, SFRP1, SERPINB5, HOXA5, TRP63, FOXD1                                                                                                                                                                                                                                                                                                                                                                                                                                                                                                                                                                                                                                                                                                                                                                                                                                                                                                                                                                                                                                                                           |
| GO: 0006355 | ~regulation of transcription, DNA-dependent | ZFP46, HTATIP2, LOC100047651, ANKRD1, PAX3, HOXD10, HOXC8, FLI1, PAX9, GATA3, TDGF1, TRP63, SOX15, HSF4, PITX3, TBL1XR1, AR, NANOG, PPARGC1A, HOXD9, INHBA, SMO, MSX1, HOXD8, MNDA, FOXC1, ZFPM1, MTDH, EHF, SOX9, TCF7C2L1, ARX, MSX2, TAL1, FOXQ1, HOXA3, HOXA5, NFAT5, HOXA10, LHX5, LHX8, FOXD1, NKX2-2, PRL2C2, KLF5, REX2, ZFP386, CDKN1C, SHOX2, HOXB1, SALL4, NR5A2, NFIA, KLF4                                                                                                                                                                                                                                                                                                                                                                                                                                                                                                                                                                                                                                                                                                                                                                                    |

**Supplementary Table S2.** A list of primers (Dnase2b, Foxe3, Hsf4, Snf2l and three control genes: B2M, SDHA, and HPRT).

| Gene         | Primer direction | Sequence 5' → 3'          |
|--------------|------------------|---------------------------|
| B2m          | Forward          | TGGTGCTTGTCTCACTGACC      |
| B2m          | Reverse          | TATGTTGCGCTTCCATTCT       |
| Bcl2         | Forward          | GGGAAACACCAGAATCAAGT      |
| Bcl2         | Reverse          | AGCCAGGAGAAATCAAACAG      |
| Bfsp         | Forward          | GTTACTGGGATGAGGGAGGAG     |
| Bfsp         | Reverse          | CTGCAGCTCAGCTTTCTGTG      |
| Cdh1         | Forward          | CAAAGTGACGCTGAAGTCCA      |
| Cdh1         | Reverse          | TACACGCTGGGAAACATGAG      |
| Cdkn1b (P27) | Forward          | TCAAACGTGAGAGTGTCTAACG    |
| Cdkn1b (P27) | Reverse          | CCGGGCCGAAGAGATTCTG       |
| Cdkn1c (P57) | Forward          | TCCTGCACCCGGGACT          |
| Cdkn1c (P57) | Reverse          | GTTGACGCTTGTCTCC          |
| Dnase2b      | Forward          | GCCCAGGGTCTAACTTCGT       |
| Dnase2b      | Reverse          | TTCTGCCAGGTTTGTGCTAA      |
| Dnmt3a       | Forward          | GTGCAGAAACATCGAGGACA      |
| Dnmt3a       | Reverse          | ATGCCTCCAATGAAGAGTGG      |
| Fgfr1        | Forward          | GTTTAAGCCTGACCACCGAA      |
| Fgfr1        | Reverse          | GAAGGCACCACAGAATCCAT      |
| Fgfr3        | Forward          | GCCTGCGTGCTAGTGTCT        |
| Fgfr3        | Reverse          | CCTGTACCATCCTTAGCCCAG     |
| Foxe3        | Forward          | GGTGGCTGATTATGGTATGGATTCC |
| Foxe3        | Reverse          | ATCAAGAAGGAAGGCCAAAGCG    |
| Gsn          | Forward          | TCCGGCTACTTCAAGTCTGG      |
| Gsn          | Reverse          | CTCTGGACCACCACCTCATT      |
| Hes1         | Forward          | CAACACGACACCGGACAA        |
| Hes1         | Reverse          | CATTATCTTGGCCTTCGC        |
| Hif1a        | Forward          | TTCTCAGTCGACACAGCCTC      |
| Hif1a        | Reverse          | CCAAAAGTTCTTCCGGCTC       |
| Hsf4         | Forward          | GGCACAAAGTAGGAGCCAAGAGTC  |
| Hsf4         | Reverse          | TTCTGTCATGGCGCAGTCT       |
| Hod          | Forward          | CAACAAGGTCAACAAGCACC      |
| Hod          | Reverse          | AACCATTCTGCGTCTGCTC       |
| Hprt         | Forward          | GTTGTTGGATATGCCCTTGA      |
| Hprt         | Reverse          | GGCTTTGTATTGGCTTTTCC      |
| Jag1         | Forward          | GTCCCAAGCATGGGTCTTGT      |
| Jag1         | Reverse          | TGCACTTGTCGAGTACAGG       |
| Mab21l1      | Forward          | CAGGAACCGCGTTTCATCAG      |
| Mab21l1      | Reverse          | CAGGAACCGCGTTTCATCAG      |
| Notch4       | Forward          | CCAGAATGCGAGACAGAACTG     |
| Notch4       | Reverse          | GGTCAACCCCATGTAGCCTG      |
| Pax6         | Forward          | GCACATGCAAACACACATGA      |
| Pax6         | Reverse          | ACTTGGACGGAAGTACAC        |
| Pitpnm2      | Forward          | GCTAGTCCTAGCCTTGAGGAAA    |
| Pitpnm2      | Reverse          | TTGTACACTTGCTGACACGCT     |
| Prox1        | Forward          | CAGCGGACTCTCTAGCACAG      |
| Prox1        | Reverse          | GCCTGCCAAAAGGGGAAAGA      |
| Rbpj         | Forward          | TGCGGTTACATGGGACTGG       |
| Rbpj         | Reverse          | GGTCTTGGCACAACCAATTC      |
| Sdha         | Forward          | GAGGAAGCACACCCTCTCATA     |
| Sdha         | Reverse          | GCACAGTCAGCCTCATTCAA      |
| Six3         | Forward          | CCCGGCTTCTCTTACCTTTCT     |
| Six3         | Reverse          | GAATCGGCGAAGTTTGCGAAC     |
| Smarca2      | Forward          | CCACCAAGTCTGAAGATCGTG     |
| Smarca2      | Reverse          | CCGCCTGAAGATTTAAGCCCA     |
| Smarca4      | Forward          | TGCTGAAGGACAGACACCTG      |
| Smarca4      | Reverse          | GAGGATCTTGCCACTCTCCA      |
| Smarca5      | Forward          | AGAGCTGTTGCGACATTCAT      |
| Smarca5      | Reverse          | CCCTGGTTTCATCTTCAAGGGT    |
| Smarcd1      | Forward          | GACGATGACTGATGTGGTGGG     |
| Smarcd1      | Reverse          | ACCTTGGAGTAGAAGTATCGGC    |
| Smarce1      | Forward          | AAAAGACCATCTTATGCCCCAC    |
| Smarce1      | Reverse          | CCTGTAGTTGTTGAGGCGAG      |
| Spg5         | Forward          | CTGGAAGGCCAGCTAGATCC      |
| Spg5         | Reverse          | TAACCCTCAGCTTGCTCACC      |
| Vim          | Forward          | GTGCGCCAGCAGTATGAAAG      |
| Vim          | Reverse          | GCATCGTTGTTCCGGTTGG       |
| Wnt7b        | Forward          | CTTACCATGATGCCATCACGG     |
| Wnt7b        | Reverse          | TGGTTGTAGTAGCCTTGCTTCT    |

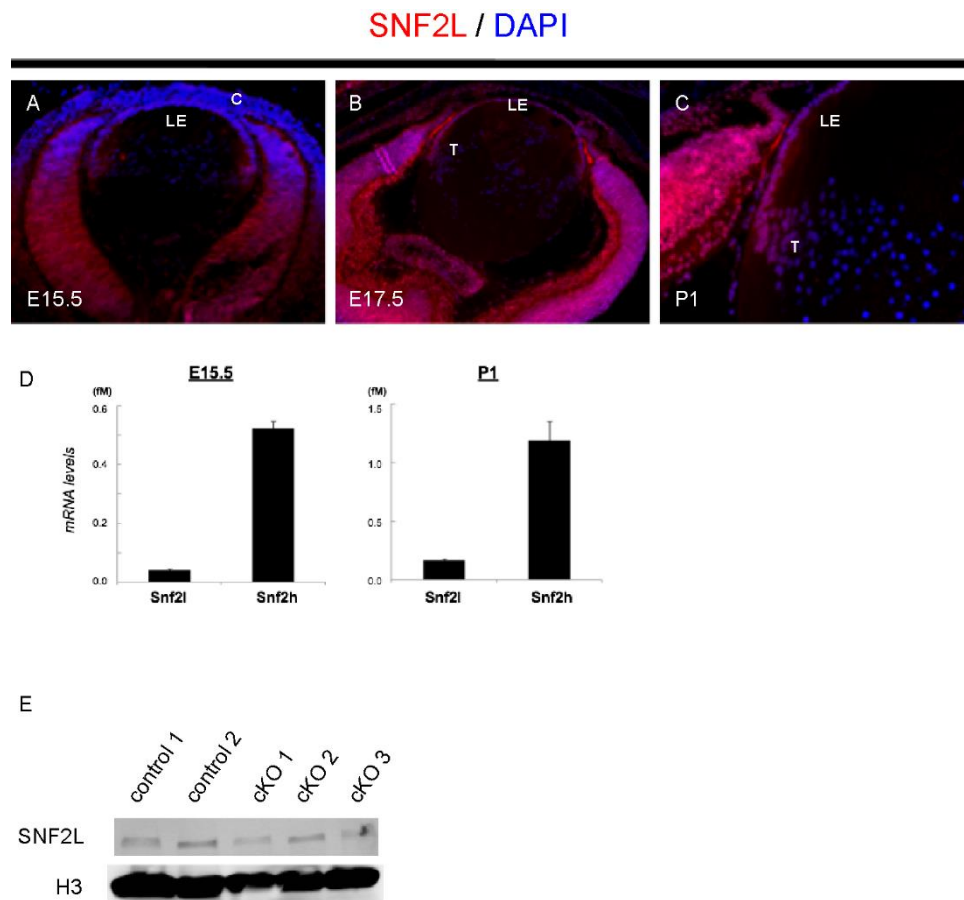

**Supplementary Fig. S1. Expression of Snf2l in wild type mouse eye. (A-C)**

Immunofluorescence (red) detection of Snf2l in the E15.5, E17.5 and P1 eye. **(D)** Relative expression of Snf2h and Snf2l in wild type E15.5 and P1 lens. **(E)** Western immunoblotting analysis of Snf2l expression in extracts prepared from “control” and Snf2h<sup>-/-</sup> cKO newborn eye tissues.

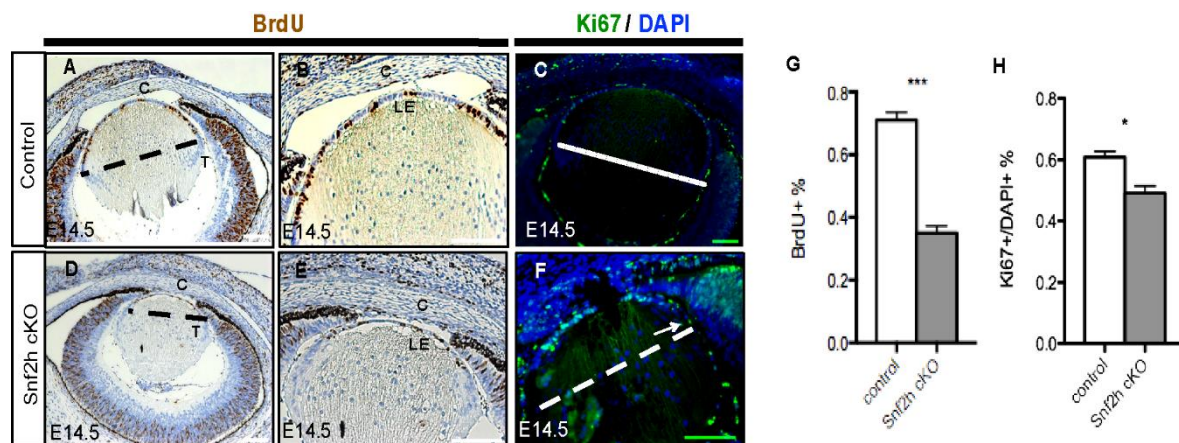

**Supplementary Fig. S2: Depletion of Snf2h leads to a reduction of lens epithelial cell proliferation.** (A-B) BrdU staining showed that the proliferating lens epithelial cells (brown) were present from the anterior of the lens epithelium to the lens equator. (D-E) In the Snf2h cKO lenses, the number of proliferating lens cells was markedly reduced, and the lens transitional zones were shifted forward. (C-F) The reduction of cell proliferation in the Snf2h cKO was observed by using the cell proliferation marker Ki67 (green). Nuclei were counterstained with DAPI (blue). (G-H) Quantification of BrdU and Ki67 positive cells versus the total number of lens epithelial cells. Scale bar = 100  $\mu$ m. Pregnant females were injected with 5-bromo-2'-deoxyuridine (BrdU) (Sigma, St. Louis, MO) intraperitoneally (100  $\mu$ g/g body weight). After two hours, the mice were sacrificed, and embryos were dissected and immediately fix with 4% paraformaldehyde. Sections were collected as described above. Monoclonal anti-BrdU was used and sections were counterstained with hematoxylin. Alternatively, embryo lens mid-sections were used to perform immunofluorescence with Ki67 antibody.

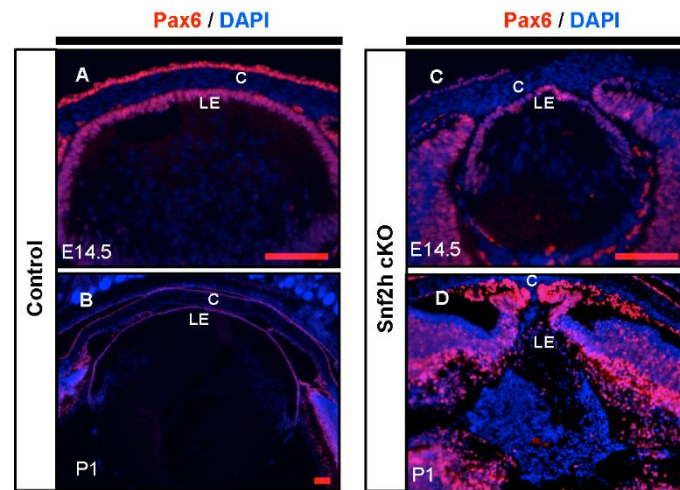

**Supplementary Fig. S3. Expression of Pax6 in wild type and Snf2h mutated embryos.**

**(A-D)** Attenuation of Pax6 expression (red) in Snf2h depleted lenses (E14.5 and P1). Lens epithelium, LE. The nuclei were counterstained with DAPI (blue). Scale bar = 100  $\mu$ m.



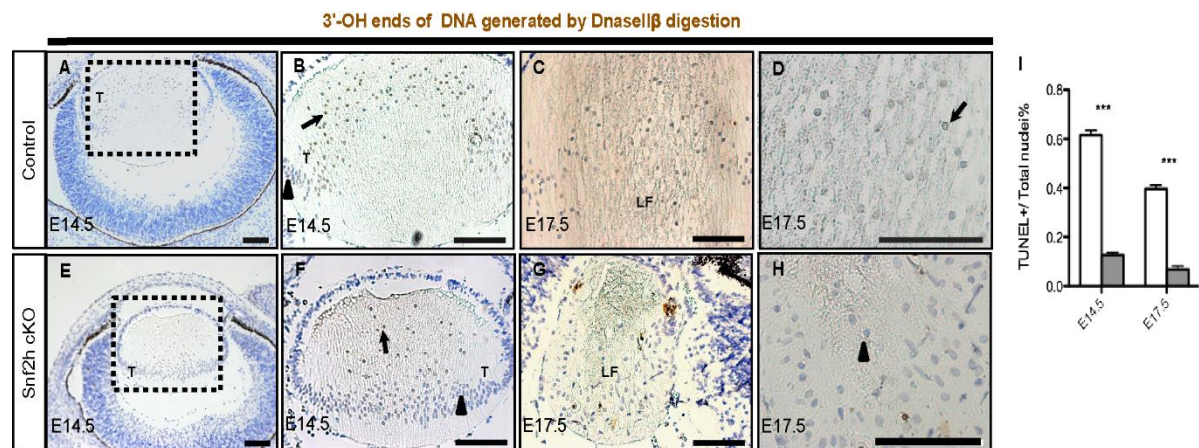

**Supplementary Fig. S4. Reduced formation of free 3'-OH ends in Snf2h mutated lens.**

(A-H) The 3'-OH ends of DNA generated by DNase II $\beta$  were evaluated by terminal deoxynucleotidyl transferase dUTP nick end labeling (TUNEL) staining (brown, source of kit) in E17.5 wild type and Snf2h depleted lenses. Panels B,D are higher magnification of panels A,C. Sections, prepared as described in Materials and Methods, were first deparaffinized and pretreated with proteinase K, followed by peroxidase blocking before TdT reaction. Sections were then incubated with Streptavidin-horse radish peroxidase (HRP) and counterstained with hematoxylin. Lens fiber cells, LF; Lens transitional zone, T. (I) Quantification of free 3'-OH-ends of DNA. Quantification or cell counting was performed using NIH ImageJ or Axionvision software followed by data normalization ( $n \geq 3$ ). To normalize pixel intensity, the mean value of least three immunoreactive negative regions from each staining section was subtracted from the examined region to score positive-stained cells. A minimum of three biological replicates (litter, embryos, and sections) were analyzed for all data sets. Histograms represent the mean  $\pm$  the standard error of the mean (SEM). Samples and control groups were compared using a two-tailed, unpaired Student T-test to calculate p value. An asterisk (\*) represents a statistically significant change ( $p < 0.05$ ).

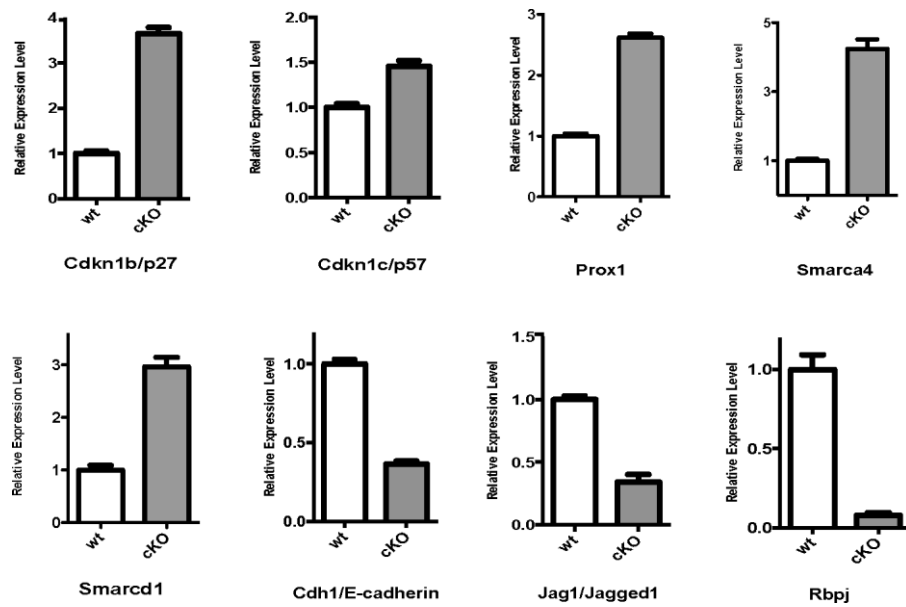

**Supplementary Figure S5. Relative expression level of Cdkn1b/p27, Cdkn1c/p57, Prox1, Cdh1, Jag1, Rbpj, Smarca4 and Smarcd1 in the control and *Snf2h*<sup>-/-</sup> cKO eyes.**
